# Supplementary material
Source: PubMed Central journal article supplement (PMC7723781)
Supplement: mmc1.pdf [file mmc1.pdf]

**Table S1.** Samples collected in surfaces and air inside public buses and subway trains in Barcelona.

**SUBWAY**

| Sample | SURFACES            |       |
|--------|---------------------|-------|
|        | Sampling time start | end   |
| L1 2   | 21:13               | 21:18 |
| L1 1   | 21:21               | 21:26 |
| L1 3   | 21:31               | 21:36 |
| L1 4   | 21:38               | 21:43 |
| L1 5   | 21:45               | 21:50 |
| L3 1   | 20:58               | 21:04 |
| L3 4   | 21:13               | 21:19 |
| L3 2   | 21:31               | 21:38 |
| L3 3   | 21:48               | 21:54 |
| L3 5   | 22:00               | 22:06 |
| L5 3   | 21:38               | 21:44 |
| L5 4   | 21:46               | 21:52 |
| L5 5   | 21:54               | 22:00 |
| L5 1   | 22:03               | 22:08 |
| L5 2   | 22:10               | 22:15 |

| Line – train | Date     | AIR   |       | Air volume (m <sup>3</sup> ) |
|--------------|----------|-------|-------|------------------------------|
|              |          | Time  |       |                              |
|              |          | start | end   |                              |
| L1 7         | 19/06/20 | 9:05  | 17:45 | 5,2                          |
| L1 6         | 19/06/20 | 9:25  | 18:00 | 5,2                          |
| L3 6         | 17/06/20 | 12:30 | 22:45 | 6,2                          |
| L3 7         | 17/06/20 | 12:30 | 22:45 | 6,2                          |
| L5 6         | 18/06/20 | 9:10  | 18:02 | 5,3                          |
| L5 7         | 18/06/20 | 9:20  | 18:13 | 5,3                          |

| AIR CONDITIONING FILTERS |                       |
|--------------------------|-----------------------|
| AA filter code           | Subway Line           |
| AC                       | L1                    |
| AC                       | L3 (virucidal filter) |
| AC                       | L5                    |

**BUSES**

| Bus number | Cleaning | SURFACES               |          |
|------------|----------|------------------------|----------|
|            |          | Sample timing Sample A | Sample B |
| B1         | Bleach   | 21:45                  | 0:32     |
| B2         | Ozone    | 20:58                  | 0:10     |
| B3         | Bleach   | 20:27                  | 0:10     |
| B4         | Ozone    | 21:18                  | 1:35     |
| B5         | Ozone    | 20:38                  | 1:40     |
| B6         | Ozone    | 22:33                  | 1:43     |
| B7         | Ozone    | 21:52                  | 1:45     |
| B8         | Bleach   | 21:30                  | 0:57     |
| B9         | Ozone    | 21:04                  | 1:50     |
| B10        | Bleach   | 21:12                  | 23:25    |
| B11        | Ozone    | 21:14                  | 0:57     |
| B12        | Ozone    | 21:31                  | 1:40     |
| B13        | Ozone    | 20:50                  | 0:00     |
| B14        | Ozone    | 22:28                  | 0:08     |
| B15        | Ozone    | 22:21                  | 0:08     |
| B16        | Bleach   | 21:37                  | 1:31     |
| B17        | Bleach   | 21:25                  | 23:00    |
| B18        | Bleach   | 21:07                  | 0:00     |
| B19        | Ozone    | 21:25                  | 1:35     |
| B20        | Ozone    | 21:59                  | 1:50     |
| B21        | Ozone    | 22:04                  | 1:00     |
| B22        | Ozone    | 20:04                  | 22:15    |
| B23        | Ozone    | 22:10                  | 0:58     |
| B24        | Ozone    | 20:43                  | 22:28    |
| B25        | Ozone    | 21:36                  | 1:55     |
| B26        | Ozone    | 21:45                  | 23:08    |
| B27        | Ozone    | 20:25                  | 22:20    |
| B28        | Ozone    | 20:55                  | 23:16    |
| B29        | Ozone    | 22:16                  | 1:25     |
| B30        | Bleach   | 21:02                  | 22:56    |

| Bus n.  | AIR        |            |            |
|---------|------------|------------|------------|
|         | 3 june     | 4 june     | 5 june     |
| B313679 | 6:30-22:30 | 6:30-22:30 | 6:30-22:30 |
| B323603 | 6:30-22:00 | 6:30-22:30 | 6:30-22:30 |

| AIR CONDITIONING FILTERS |          |                   |          |
|--------------------------|----------|-------------------|----------|
| AA filter                | Cleaning | Dust in AA filter | Cleaning |
| Bus                      | 25-may   | Bus               | 25-may   |
| B33                      | Ozone    | B33               | Ozone    |
| B34                      | Bleach   | B36               | Ozone    |
| B35                      | Bleach   | B38               | Ozone    |
| B36                      | Ozone    |                   |          |
| B37                      | Ozone    |                   |          |
| B38                      | Ozone    |                   |          |

**Table S2.** Parameters of the standard curves included in the RTqPCR analysis.

| TARGET | SLOPE | INTERCEPT | EFFICIENCY | R <sup>2</sup> |
|--------|-------|-----------|------------|----------------|
| IP2    | -3.42 | 40.23     | 96.0       | 0.981          |
| IP4    | -3.40 | 39.38     | 96.7       | 0.997          |
| E      | -3.44 | 39.15     | 95.5       | 0.993          |
